# Supplementary material for: The same video game in 2D, 3D or virtual reality – How does technology impact game evaluation and brand placements?
Source: PLOS journal article supplement (doi:10.1371/journal.pone.0200724), 2018-07-20

### S3 Appendix. Supplementary figures and tables.

| Table S1. ANOVAs comparing the three technology groups (2D, 3D, VR) |        |       |
|---------------------------------------------------------------------|--------|-------|
| Item                                                                | F      | p     |
| Presence in the 2D, 3D and VR video game                            | 5.104  | <0.01 |
| Attitude towards the video game                                     | .365   | ns    |
| Arousal while playing the video game                                | .984   | ns    |
| Attitude towards the brands placed in the video game_nachos         | .437   | ns    |
| Attitude towards the brands placed in the video game_chocolate      | 1.340  | ns    |
| Attitude towards the brands placed in the video game_smartphone     | 1.186  | ns    |
| Attitude towards the brands placed in the video game_energy drink   | .748   | ns    |
| Memory_recall                                                       | 8.514  | <0.01 |
| Memory_recognition                                                  | 14.571 | <0.01 |

**Figure S1.** Presence in the 2D, 3D and VR video game (F=5.104, p<0.01)

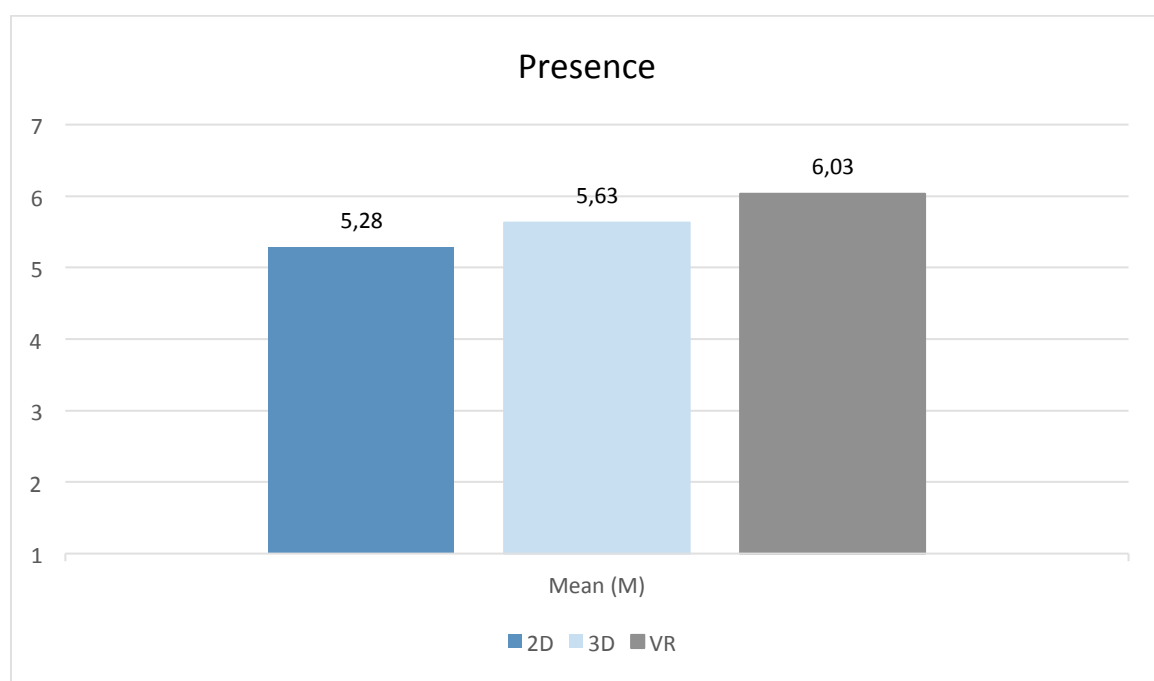

**Figure S2.** Arousal while playing the video game ( $F=.984$ , ns)

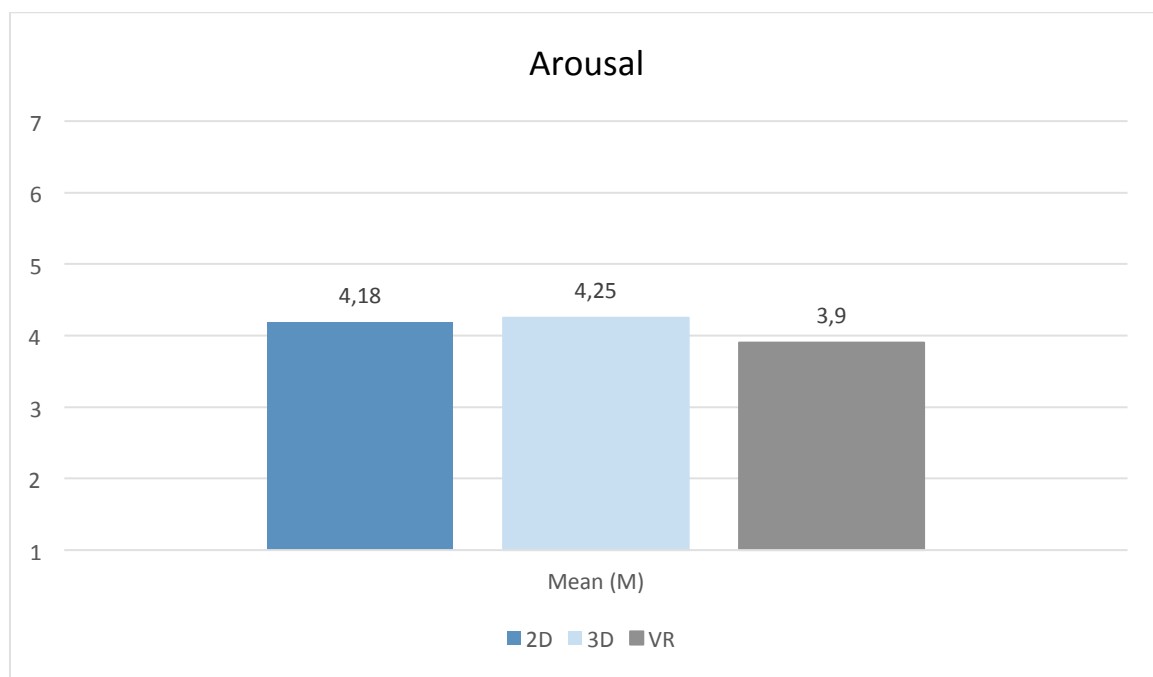

**Figure S3.** Attitude towards the video game ( $F=.365$ , ns)

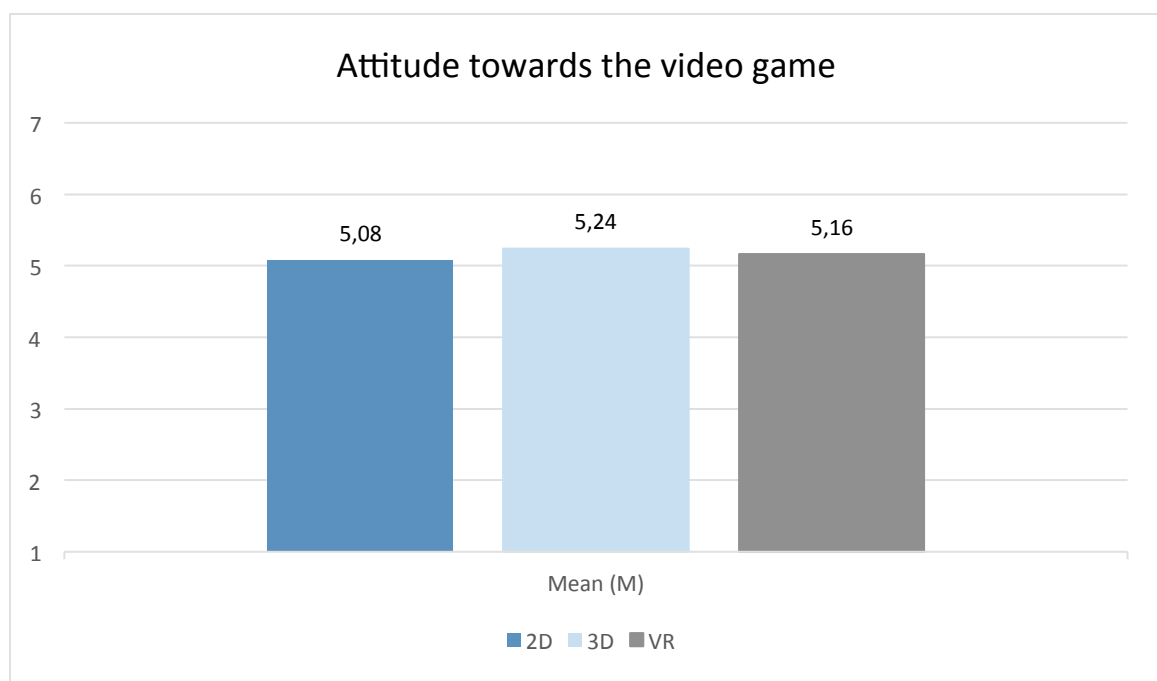

**Figure S4.** Memory for the placed brands (Recall:  $F=8.514$ ,  $p<.01$ )

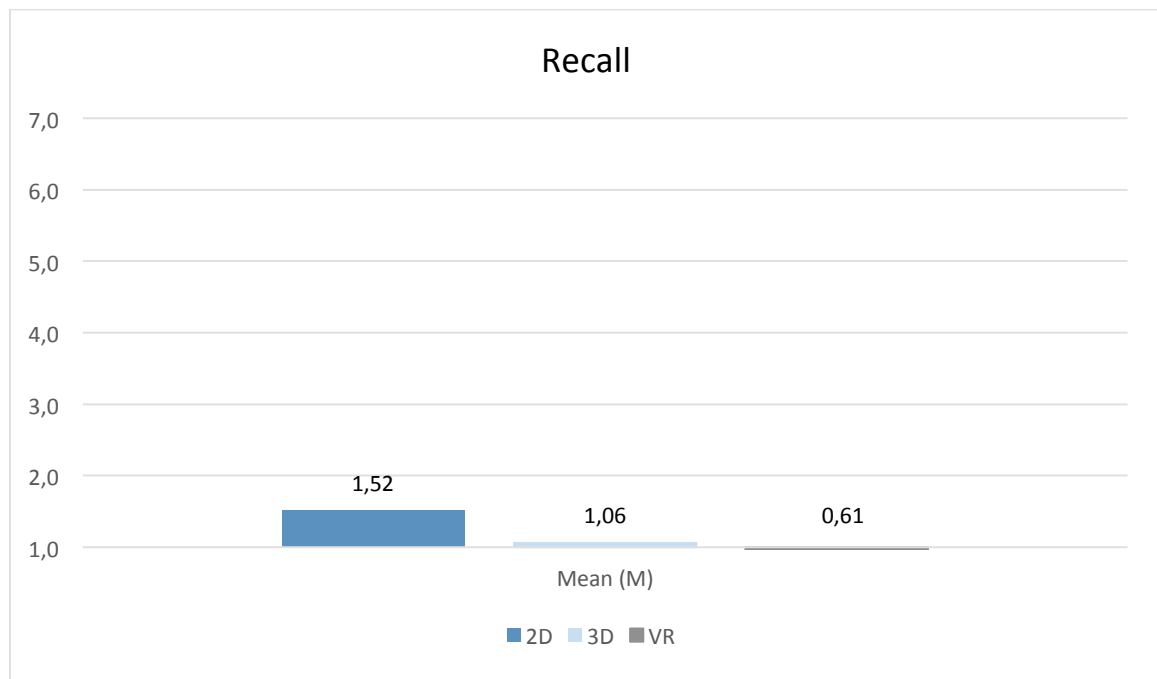

**Figure S5.** Memory for the placed brands (Recognition:  $F=14.571$ ,  $p<.01$ )

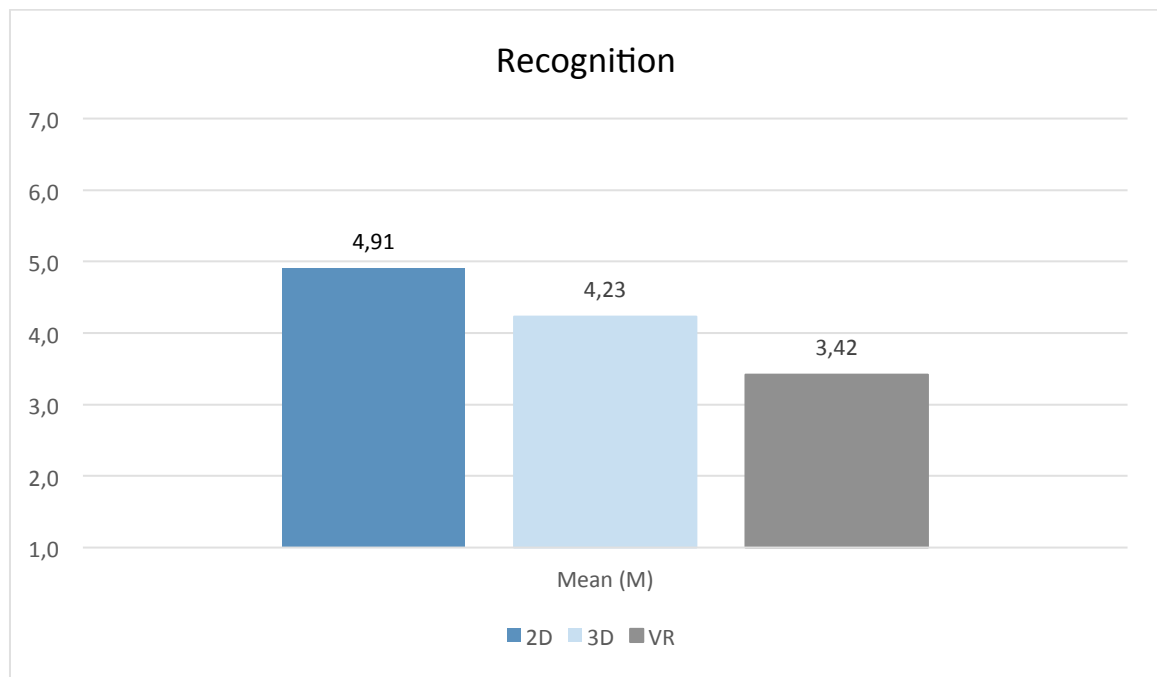

Supplement: S3 (10.1371/journal.pone.0200724.s003) [file journal.pone.0200724.s003]
